# Supplementary material for: Genome-Wide Association Analysis Unravels New QTLs for Eight Lodging Resistance Constituent Traits in Rice (<em>Oryza sativa</em> L.)
Source: Preprints.org preprint supplement (doi:10.20944/preprints202312.1163.v1), 2023-12-19
Supplement: Supplementary file 1 [file supplementary]

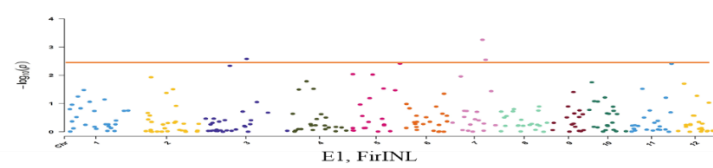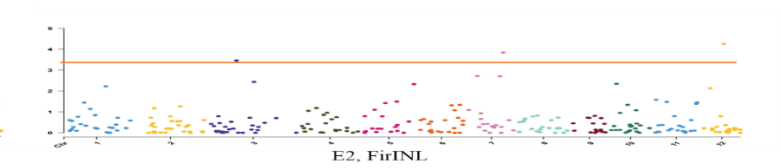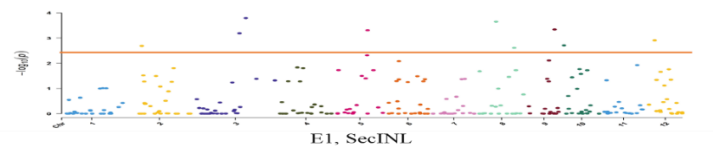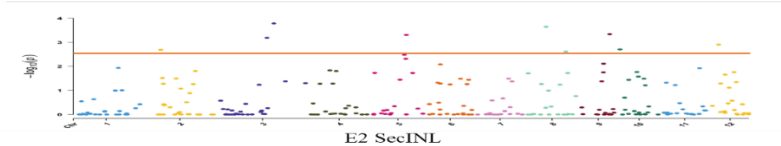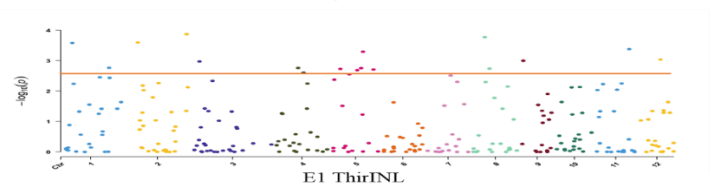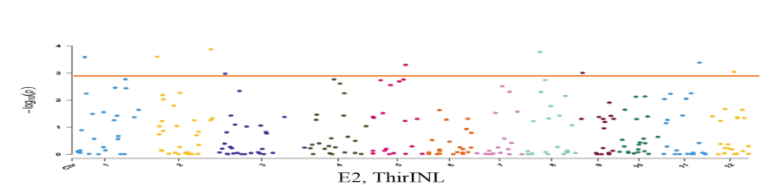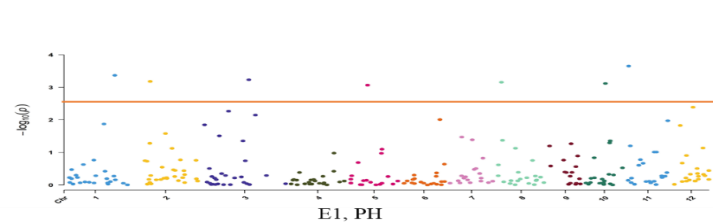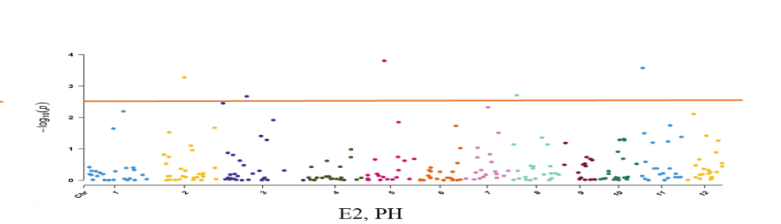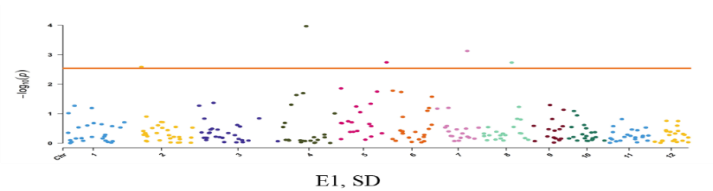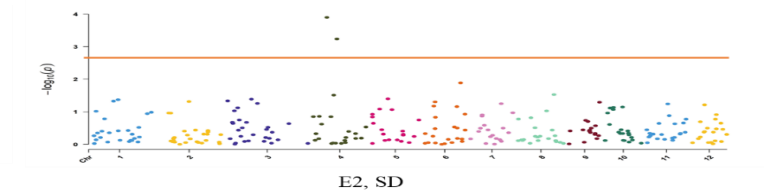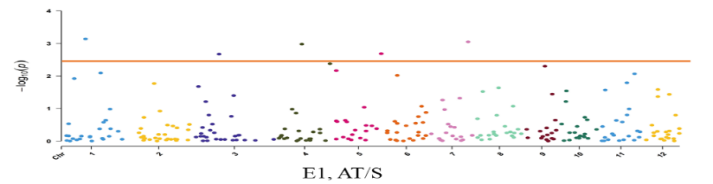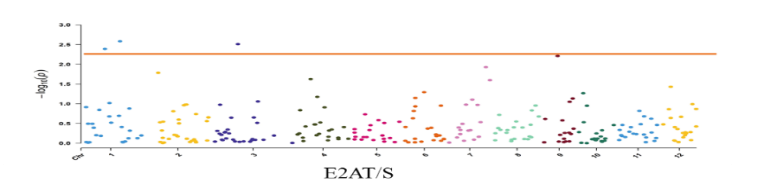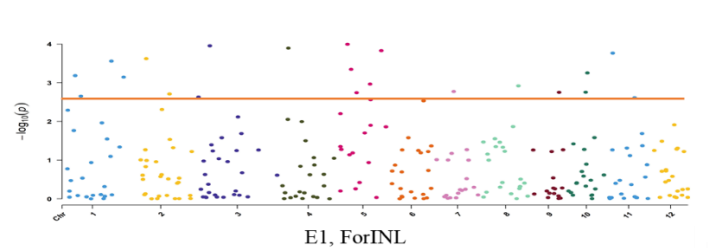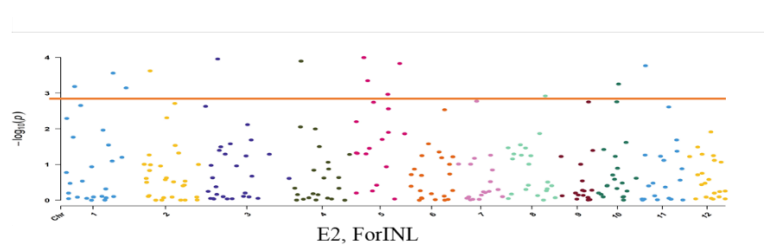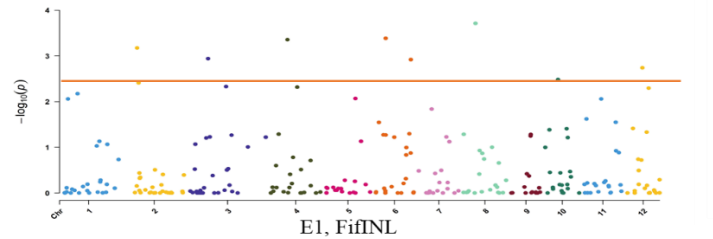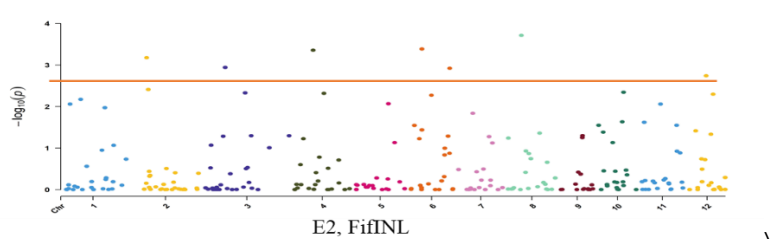

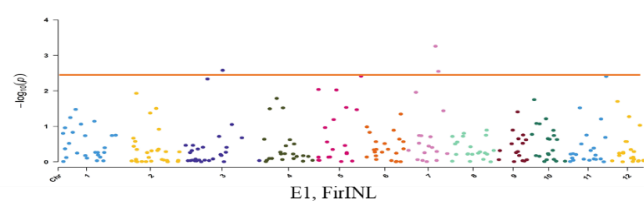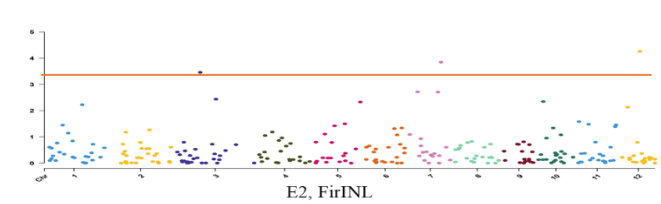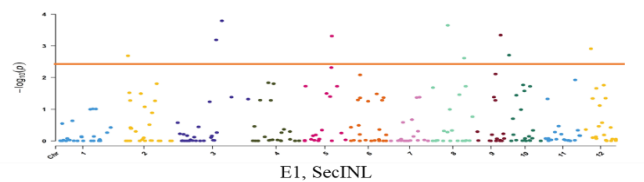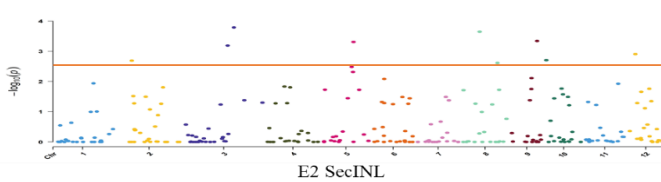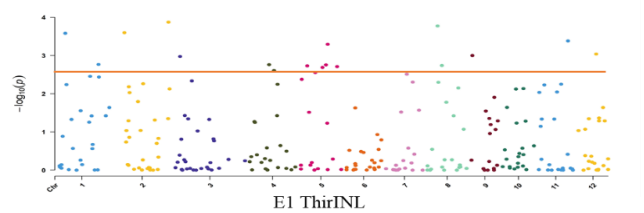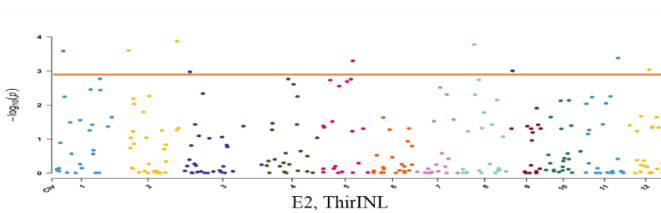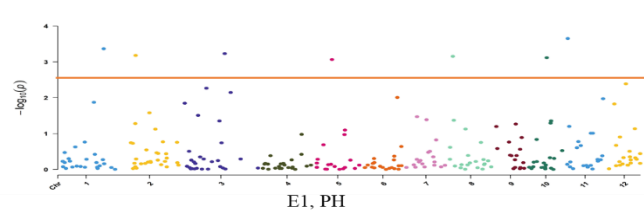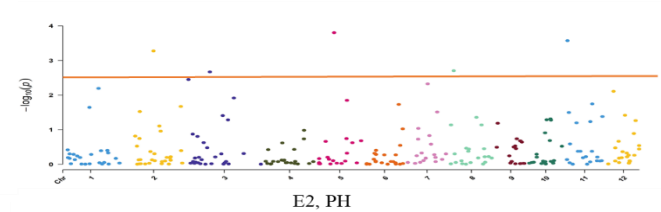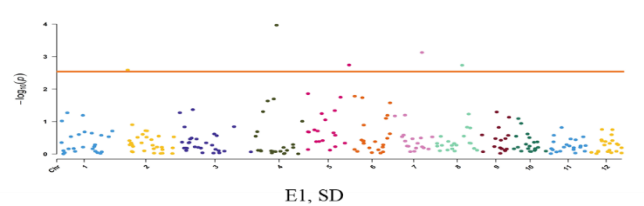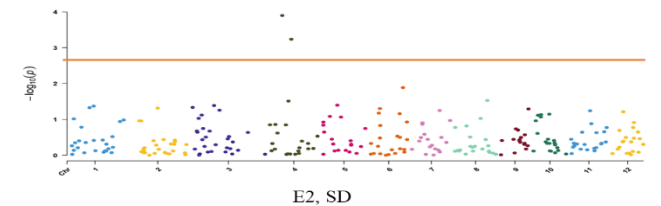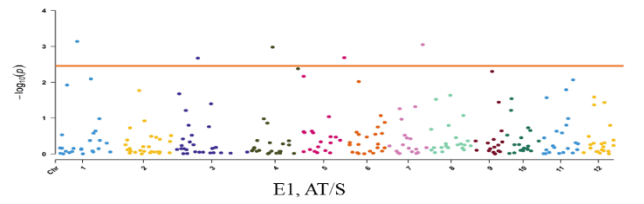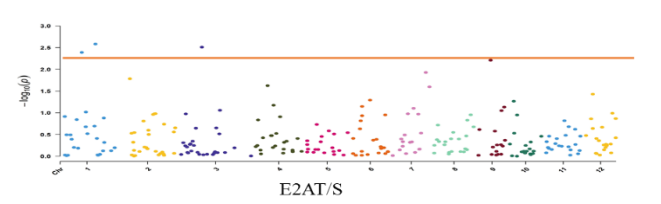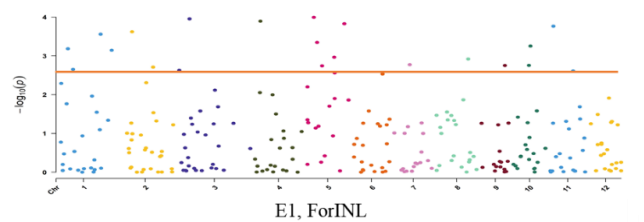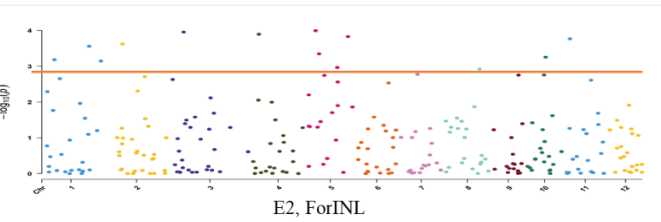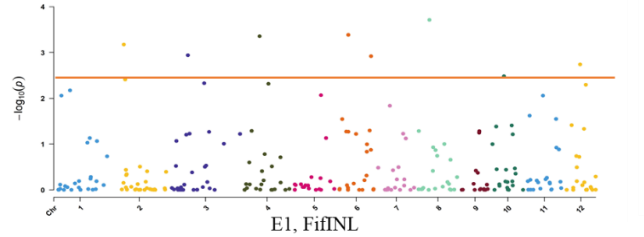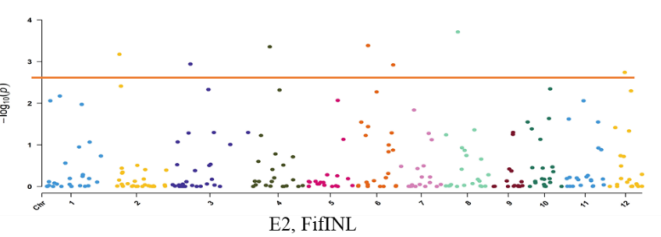

**Supplementary Figure 5** Genome-wide association showing significant loci associated with PH and its component traits in E1 and E2
