# Supplementary material for: Genome-Wide Association Analysis Unravels New QTLs for Eight Lodging Resistance Constituent Traits in Rice (<em>Oryza sativa</em> L.)
Source: Preprints.org preprint supplement (doi:10.20944/preprints202312.1163.v1), 2023-12-19
Supplement: Supplementary file 2 [file supplementary]

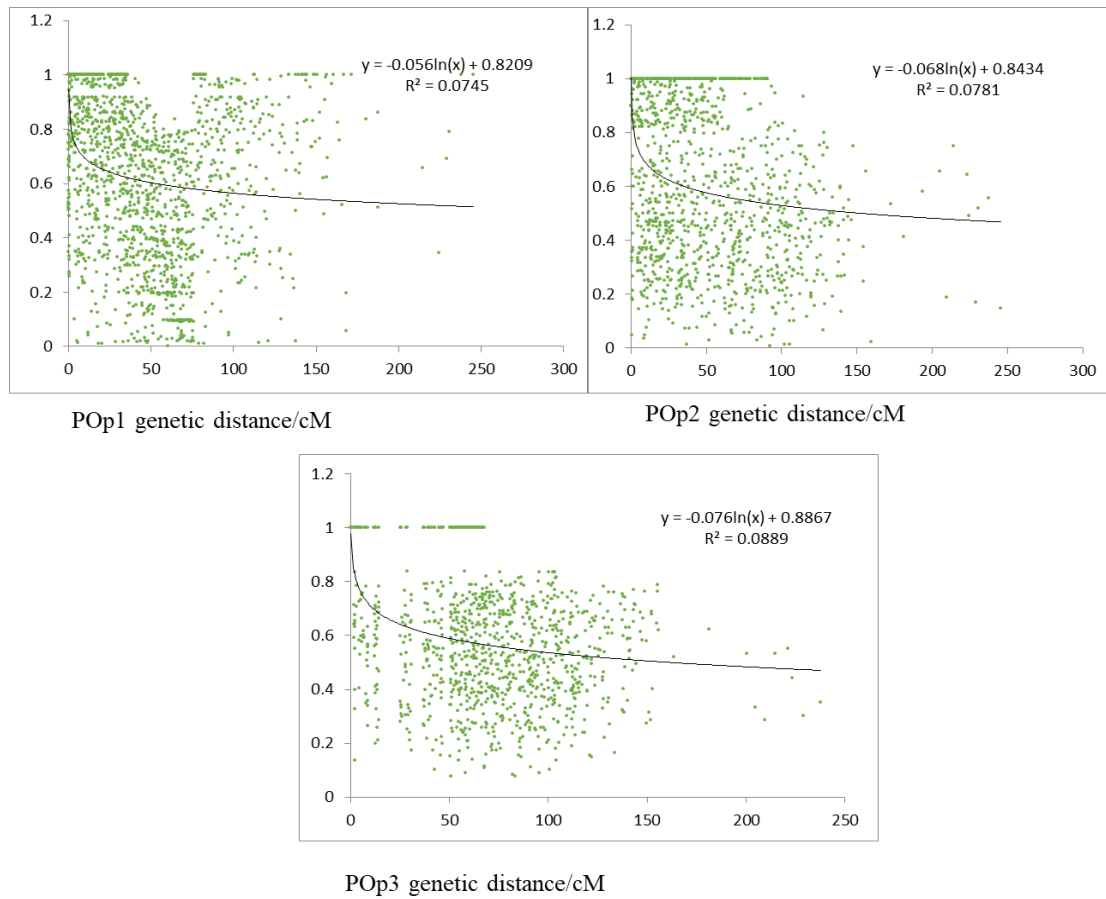

**Figure 4** Relationship between  $D'$  value and genetic distance of syntenic marker pairs in subpopulations  
POP1, POP2 and POP3 represent subpopulation 1 to subpopulation 3, respectively.
