# Supplementary material for: Genome-Wide Association Analysis Unravels New QTLs for Eight Lodging Resistance Constituent Traits in Rice (<em>Oryza sativa</em> L.)
Source: Preprints.org preprint supplement (doi:10.20944/preprints202312.1163.v1), 2023-12-19
Supplement: Supplementary file 3 [file supplementary]

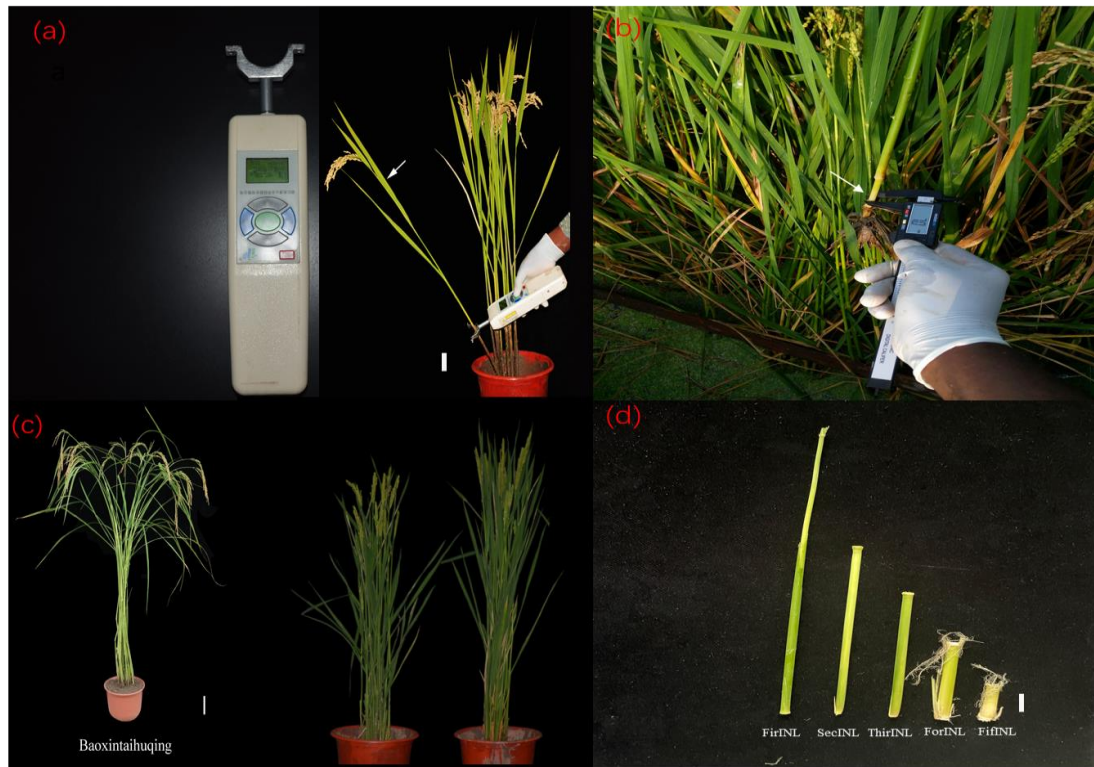

**Fig. 1** Images showing measurements of stem anti-thrust, stem diameters Plant height and 1 to 5 internode lengths with their materials on the field
