# Supplementary material for: Genome-Wide Association Analysis Unravels New QTLs for Eight Lodging Resistance Constituent Traits in Rice (<em>Oryza sativa</em> L.)
Source: Preprints.org preprint supplement (doi:10.20944/preprints202312.1163.v1), 2023-12-19

**Supplementary Figure 3.** Neighbor joining tree for the 518 accessions constructed using Nei's (1983) genetic distance.

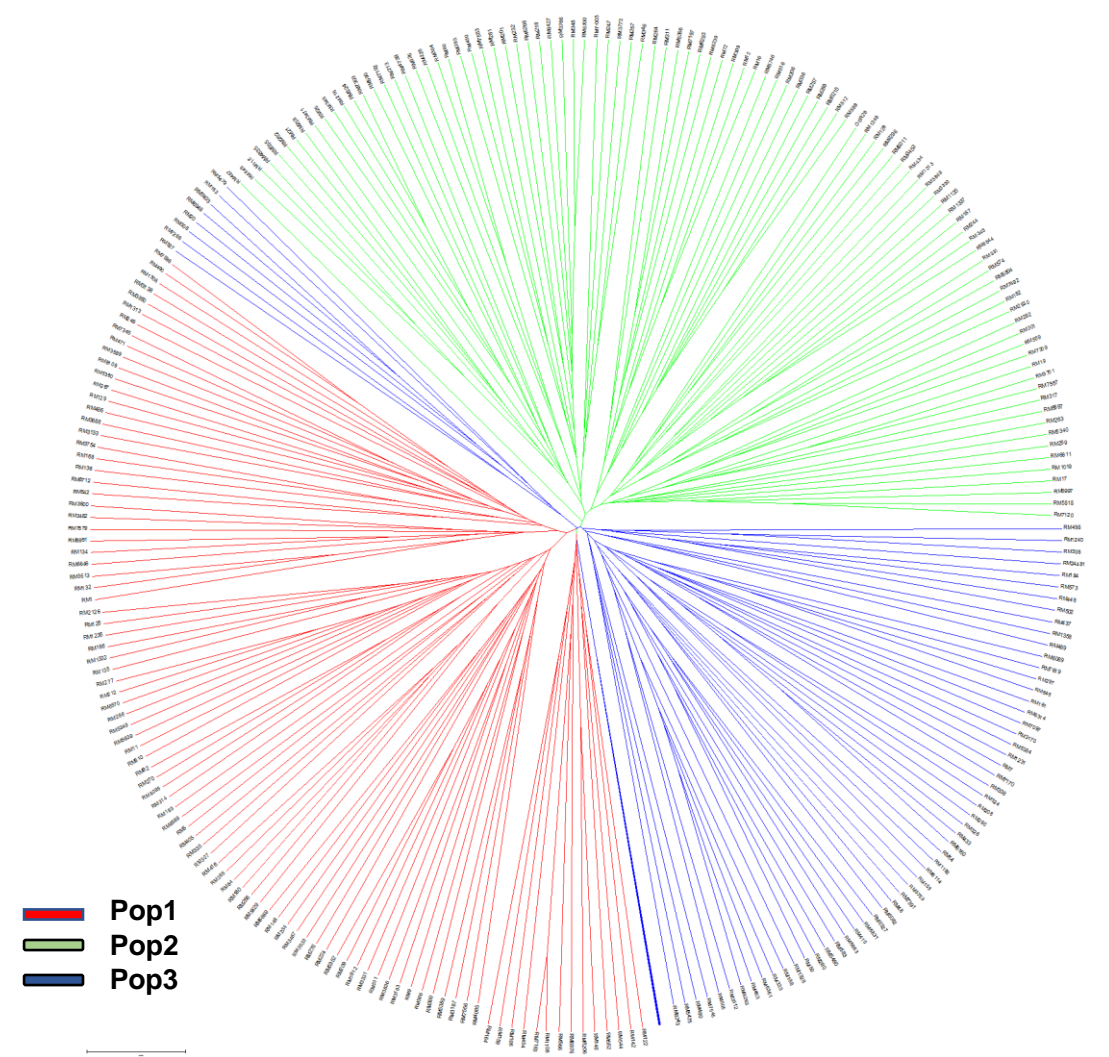

Supplement: Supplementary file 4 [file supplementary]
