# Supplementary material for: Genome-Wide Association Analysis Unravels New QTLs for Eight Lodging Resistance Constituent Traits in Rice (<em>Oryza sativa</em> L.)
Source: Preprints.org preprint supplement (doi:10.20944/preprints202312.1163.v1), 2023-12-19
Supplement: Supplementary file 5 [file supplementary]

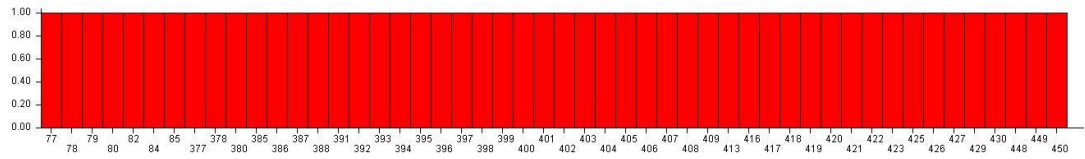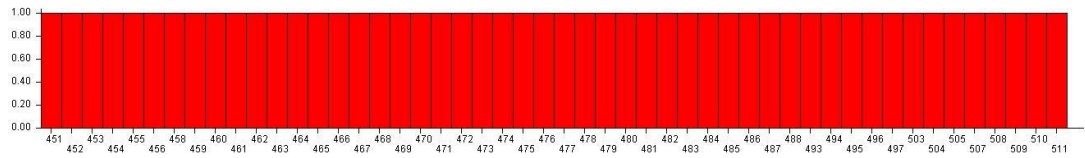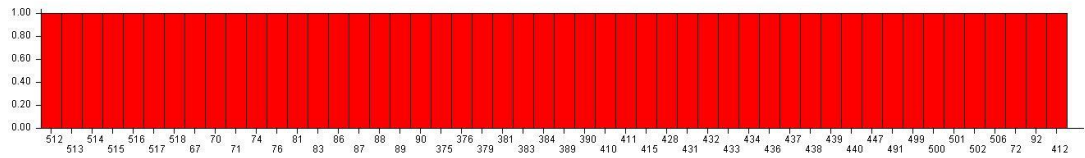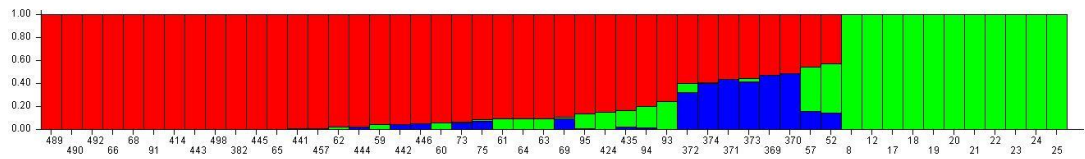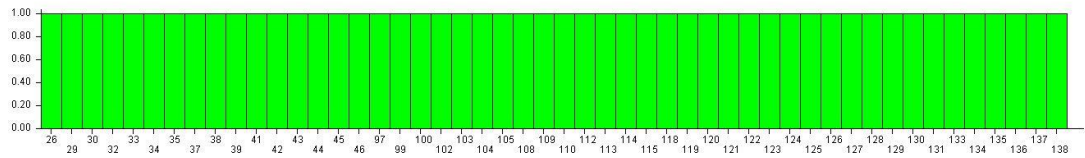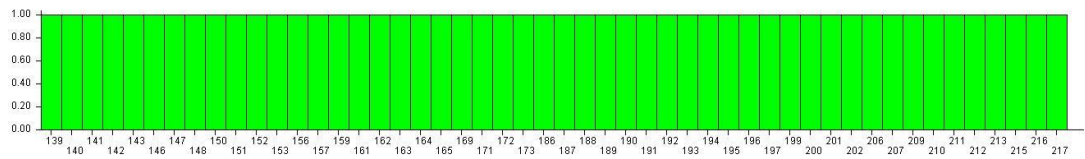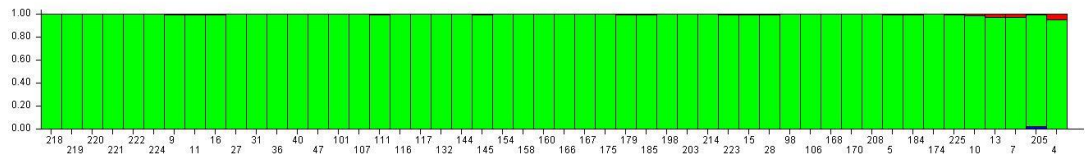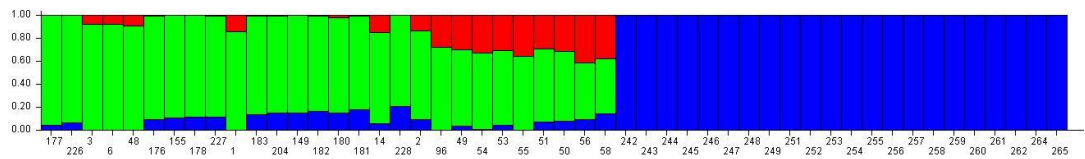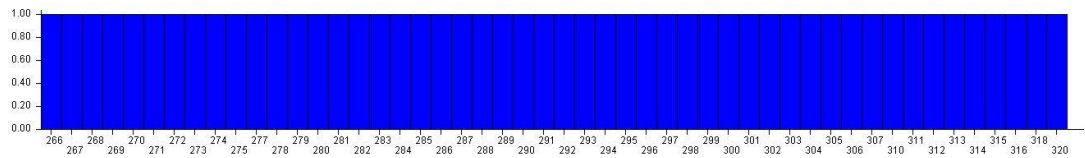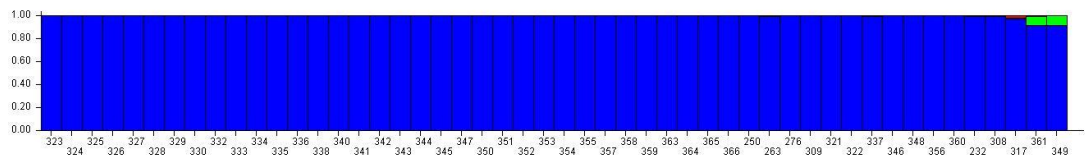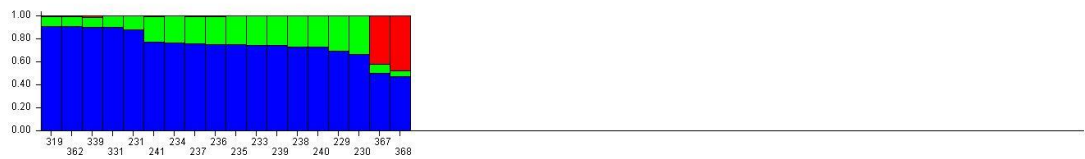

**Supplementary Figure 2.** 518 rice variety belonging to Three subpopulations, calculated by STRUCTURE software. Each vertical bar represents an accession and within each vertical bar, the colored subsections represent membership coefficient (Q) of the accession to different clusters. Identified subpopulations are Sub-pop 1 (red color), Sub-pop 2 (green color) and Subpop 3 (navy blue color). The numbers in the X-axis stand for variety code corresponding to Table S1.
